# Supplementary material
Source: publisher site journal article supplement (https://www.spandidos-publications.com/8379/downloadSupplementary)

Figure S1. UPLC-Q-TOF/MS BPC-positive ionization pattern of tonic extract samples (A: aqueous extract; B: ethanol extract). UPLC-Q-TOF/MS, ultra-high-performance liquid chromatography-triple/time-of-flight mass spectrometry; BPC, base peak ion current.

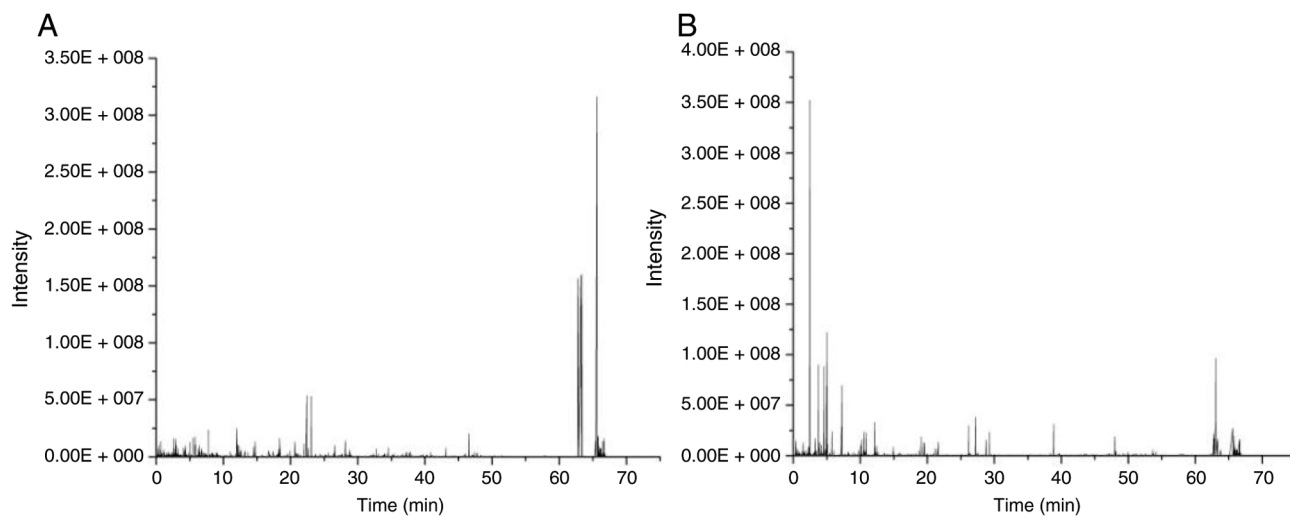

Supplement: Supplementary file 1 [file downloadSupplementary]
